# Supplementary material for: Fractionation of impulsive and compulsive trans-diagnostic phenotypes and their longitudinal associations
Source: PubMed Central journal article supplement (PMC6724459; doi:10.1177/0004867419844325), 2019-04-19
Supplement: supplementary_file.pdf [file supplementary_file.pdf]

**Supplementary Online File – Chamberlain et al.**

**Supplementary Table 1. Number and percentage of sample endorsing each problematic behaviour, ranked by highest to lowest. For original item descriptions and validation see (Guo et al., 2017).**

| ICBC Scale item (behaviour)  | Problematic (often/always) |      |
|------------------------------|----------------------------|------|
|                              | N                          | %    |
| impcomp_7_list               | 97                         | 14.8 |
| impcomp_5_ordering           | 88                         | 13.5 |
| impcomp_4_money              | 85                         | 13.0 |
| impcomp_6_shopping           | 81                         | 12.4 |
| impcomp_18_planning          | 73                         | 11.2 |
| impcomp_23_swearing          | 73                         | 11.2 |
| impcomp_29_social_networking | 72                         | 11.0 |
| impcomp_24_checkinglocks     | 68                         | 10.4 |
| impcomp_8_counting           | 61                         | 9.3  |
| impcomp_12_exercising        | 57                         | 8.7  |
| impcomp_3_collect            | 56                         | 8.6  |
| impcomp_25_checkingmirror    | 56                         | 8.6  |
| impcomp_32_rewriting         | 53                         | 8.1  |
| impcomp_10_routines          | 51                         | 7.8  |
| impcomp_9_grooming           | 45                         | 6.9  |
| impcomp_1_washing            | 41                         | 6.3  |
| impcomp_14_hairpicking       | 39                         | 6.0  |
| impcomp_11_repeating         | 37                         | 5.7  |
| impcomp_17_alcohol           | 35                         | 5.4  |
| impcomp_30_rules             | 34                         | 5.2  |
| impcomp_20_cleaning          | 32                         | 4.9  |
| impcomp_16_sexual            | 31                         | 4.7  |
| impcomp_15_lying             | 26                         | 4.0  |
| impcomp_21_verbal            | 24                         | 3.7  |
| impcomp_31_injury            | 18                         | 2.8  |
| impcomp_2_smoking            | 17                         | 2.6  |
| impcomp_26_driving           | 15                         | 2.3  |
| impcomp_19_drug              | 12                         | 1.8  |
| impcomp_33_tattooing         | 12                         | 1.8  |
| impcomp_27_medication        | 11                         | 1.7  |
| impcomp_22_violence          | 10                         | 1.5  |
| impcomp_28_aggression        | 10                         | 1.5  |
| impcomp_13_betting           | 8                          | 1.2  |



**Supplementary Table 2. Factor analysis for Family measures; baseline FAD, PPQ, and MOPs. Varimax rotation. Factor analysis yielded an optimal three-factor solution corresponding broadly to general parenting, paternal parenting, and maternal parenting.**

|                               | <b>Factor 1</b> | <b>Factor 2</b> | <b>Factor 3</b> |
|-------------------------------|-----------------|-----------------|-----------------|
| fad_01_planning_activities_B1 | -0.547238       | 0.208334        | 0.076752        |
| fad_02_cant_talk_sadness_B1   | -0.672641       | 0.129103        | 0.058860        |
| fad_03_feel_accepted_B1       | 0.472165        | -0.264937       | -0.080512       |
| fad_04_dont_get_along_B1      | -0.565752       | 0.245882        | 0.180767        |
| fad_05_express_feelings_B1    | 0.674635        | -0.133244       | -0.066200       |
| fad_06_crisis_support_B1      | 0.601494        | -0.152014       | -0.031224       |
| fad_07_avoid_fears_B1         | -0.526606       | 0.081896        | 0.043102        |
| fad_08_solve_problems_B1      | 0.558286        | -0.207280       | -0.153954       |
| fad_09_confide_each_other_B1  | 0.662436        | -0.093072       | -0.026798       |
| fad_10_bad_feelings_B1        | -0.471003       | 0.298365        | 0.131157        |
| fad_11_accepted_B1            | 0.507883        | -0.241655       | -0.111908       |
| fad_12_decisions_problem_B1   | -0.487254       | 0.248221        | 0.099861        |
| apq_01_good_job_B1            | 0.609592        | -0.149168       | -0.228817       |
| apq_02_threaten_punish_B1     | -0.265094       | 0.180640        | 0.111741        |
| apq_03_fails_note_B1          | -0.288870       | 0.102757        | 0.081039        |
| apq_04_games_B1               | 0.625299        | -0.150003       | -0.195314       |
| apq_05_talk_out_punish_B1     | -0.080303       | 0.068991        | -0.020814       |
| apq_06_ask_school_B1          | 0.516450        | -0.114427       | -0.270524       |
| apq_07_stays_out_B1           | -0.144916       | 0.097129        | 0.058304        |
| apq_08_homework_B1            | 0.476666        | -0.112805       | -0.128946       |
| apq_09_compliment_B1          | 0.646527        | -0.145398       | -0.287235       |
| apq_10_praise_B1              | 0.549897        | -0.143812       | -0.184160       |
| apq_11_out_friends_B1         | -0.402493       | 0.087886        | 0.107516        |
| apq_12_punish_early_B1        | -0.045177       | 0.070352        | 0.012837        |
| apq_13_spank_B1               | -0.143259       | 0.230561        | 0.241285        |
| apq_14_slap_B1                | -0.235086       | 0.310520        | 0.276571        |
| apq_15_hit_B1                 | -0.168838       | 0.220696        | 0.208459        |
| mops_mum01_overprotective_B1  | -0.117161       | 0.121324        | -0.139883       |
| mops_mum02_abusive_B1         | -0.279530       | 0.165638        | 0.569752        |
| mops_mum03_overcontrolling_B1 | -0.235632       | 0.196838        | 0.218999        |
| mops_mum04_guilty_B1          | -0.250222       | 0.269687        | 0.456317        |
| mops_mum05_ignored_B1         | -0.169700       | 0.186528        | 0.677657        |
| mops_mum06_critical_B1        | -0.296096       | 0.218219        | 0.409755        |
| mops_mum07_unpredictable_B1   | -0.180801       | 0.158012        | 0.603880        |
| mops_mum08_uncaring_B1        | -0.146691       | 0.018113        | 0.829674        |
| mops_mum09_violent_B1         | -0.213518       | 0.177831        | 0.596283        |
| mops_mum10_rejecting_B1       | -0.105363       | 0.054073        | 0.773359        |
| mops_mum11_left_B1            | -0.232416       | 0.128328        | 0.515551        |
| mops_mum12_forget_B1          | -0.113307       | 0.004932        | 0.707009        |
| mops_mum13_uninterested_B1    | -0.150325       | -0.035921       | 0.722987        |
| mops_mum14_danger_B1          | -0.071321       | 0.137109        | 0.607757        |
| mops_mum15_unsafe_B1          | -0.101437       | 0.066390        | 0.649114        |
| mops_dad01_overprotective_B1  | -0.118675       | -0.095268       | -0.023414       |
| mops_dad02_abusive_B1         | -0.302794       | 0.615893        | 0.068391        |
| mops_dad03_overcontrolling_B1 | -0.296815       | 0.281799        | 0.090779        |
| mops_dad04_guilty_B1          | -0.291750       | 0.556320        | 0.129004        |
| mops_dad05_ignored_B1         | -0.193290       | 0.745416        | 0.157472        |
| mops_dad06_critical_B1        | -0.249017       | 0.549219        | 0.077189        |
| mops_dad07_unpredictable_B1   | -0.252191       | 0.666023        | 0.108111        |
| mops_dad08_uncaring_B1        | -0.150943       | 0.810779        | 0.157088        |
| mops_dad09_violent_B1         | -0.228340       | 0.563792        | 0.040966        |
| mops_dad10_rejecting_B1       | -0.123108       | 0.796905        | 0.197000        |
| mops_dad11_left_B1            | -0.199347       | 0.630235        | 0.172926        |
| mops_dad12_forget_B1          | -0.113729       | 0.744063        | 0.182330        |
| mops_dad13_uninterested_B1    | -0.168528       | 0.738255        | 0.148740        |
| mops_dad14_danger_B1          | -0.117250       | 0.759869        | 0.080733        |
| mops_dad15_unsafe_B1          | -0.154001       | 0.748807        | 0.086786        |
| ppq_01_quality_time_B1        | 0.659200        | -0.111140       | -0.133581       |
| ppq_02_attend_school_B1       | 0.553836        | -0.205185       | -0.264559       |

|                             | <b>Factor 1</b> | <b>Factor 2</b> | <b>Factor 3</b>  |
|-----------------------------|-----------------|-----------------|------------------|
| ppq_03_affection_B1         | 0.647323        | -0.151684       | -0.187810        |
| ppq_04_get me_B1            | 0.490038        | -0.241933       | -0.234575        |
| ppq_05_comforted_B1         | 0.741944        | -0.218714       | -0.203940        |
| ppq_06_angry_listen_B1      | 0.739782        | -0.139884       | -0.176330        |
| ppq_07_praised_B1           | 0.676847        | -0.185377       | -0.305175        |
| ppq_08_ideas_encouraged_B1  | 0.702899        | -0.208536       | -0.279036        |
| ppq_09_priority_B1          | 0.689143        | -0.201396       | -0.306553        |
| ppq_10_loved_B1             | 0.656038        | -0.259801       | -0.354993        |
| ppq_11_listened_to_B1       | 0.772309        | -0.228558       | -0.249767        |
| ppq_12_contact_B1           | 0.546596        | -0.206974       | -0.300136        |
| ppq_13_home_safe_B1         | 0.394675        | -0.388621       | <b>-0.413940</b> |
| ppq_14_opinions_valued_B1   | 0.755413        | -0.200207       | -0.242450        |
| ppq_15_talked_important_B1  | 0.790570        | -0.128205       | -0.215853        |
| ppq_16_privacy_respected_B1 | 0.569107        | -0.247863       | -0.173495        |
| ppq_17_friends_welcomed_B1  | 0.386843        | -0.231163       | -0.262560        |
| ppq_18_clothes_B1           | 0.301213        | -0.194910       | <b>-0.383426</b> |
| ppq_19_pocket_money_B1      | 0.336293        | -0.104612       | -0.150965        |
| ppq_20_ask_B1               | 0.541811        | -0.219459       | -0.250330        |
| ppq_21_achieve_B1           | 0.405041        | -0.104150       | <b>-0.433269</b> |
| ppq_22_cared_unwell_B1      | 0.387813        | -0.184888       | -0.375585        |
| ppq_23_skills_B1            | 0.608445        | -0.208298       | -0.298424        |
| ppq_24_advice_B1            | 0.693763        | -0.204428       | -0.261923        |
| ppq_25_learn_school_B1      | 0.349574        | -0.132913       | <b>-0.427536</b> |
| ppq_26_progress_B1          | 0.439963        | -0.147804       | -0.396667        |

**Supplementary Table 3. Factor analysis for baseline friendship questionnaire. Varimax rotation. Factor analysis yielded an optimal three-factor solution corresponding broadly to number of friend and happiness; confiding and understanding; and teasing/arguments.**

|                             | <b>Factor 1</b> | <b>Factor 2</b> | <b>Factor 3</b> |
|-----------------------------|-----------------|-----------------|-----------------|
| fq_01_number_friends_B1     | 0.234507        | 0.741151        | -0.111058       |
| fq_02_see_friends_B1        | 0.363220        | 0.388374        | 0.133014        |
| fq_03_friends_understand_B1 | 0.809284        | 0.318706        | -0.220105       |
| fq_04_confide_in_friends_B1 | 0.665423        | 0.319904        | -0.152303       |
| fq_05_friends_tease_B1      | -0.057429       | -0.026811       | 0.666492        |
| fq_06_not_friends_tease_B1  | -0.113377       | -0.019231       | 0.524172        |
| fq_07_arguments_B1          | -0.039992       | -0.114816       | 0.670419        |
| fq_08_overall_happy_B1      | 0.414031        | 0.713689        | -0.183807       |

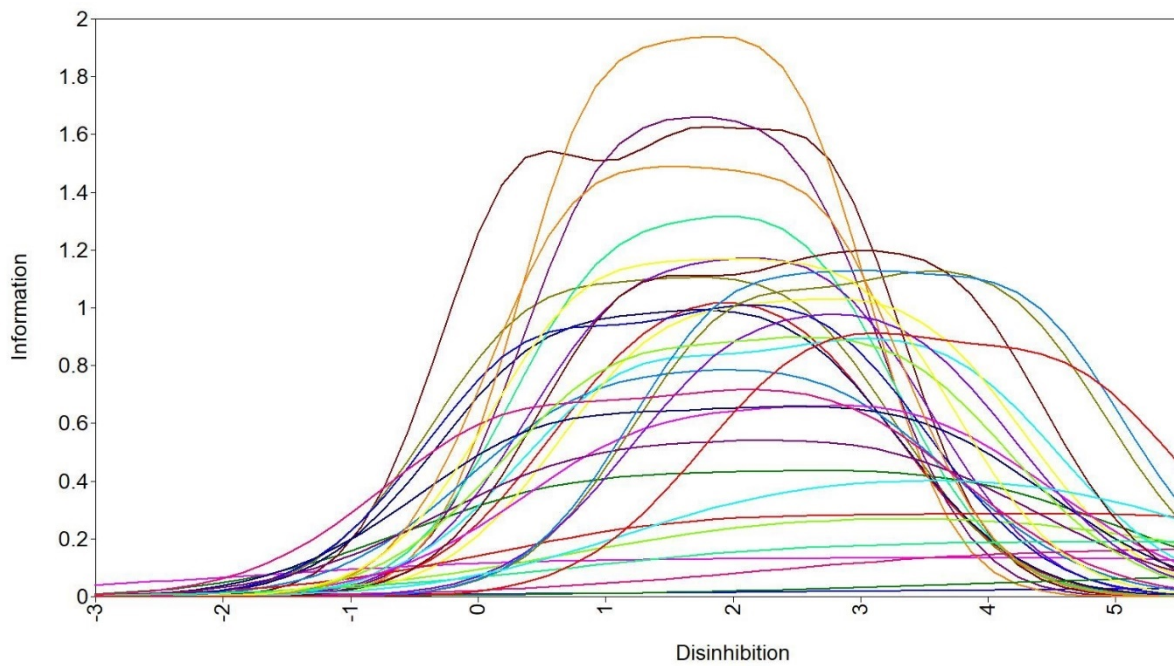

**Supplementary Figure 1. Item information functions for the 33 ICBC items in relation to the latent trait Disinhibition ( $\theta$ ). The information functions were distinct for different items, suggesting that the general Disinhibition factor from the bi-factor model of the ICBC was not attributable to response bias.**

## **Additional Discussion regarding OC traits on the Padua Inventory**

As anticipated, most of the Padua obsessive-compulsive inventory subscores (Sanavio, 1988) were associated with later emergence of compulsive but not impulsive problem behaviours, especially so for archetypal contamination obsessions and washing compulsions. The one exception here was the ‘impulses to harm self/others’ Padua subscore, which was associated with impulsive problems, indicating that items originally designed to measure compulsivity in fact are endorsed by impulsive individuals, with implications for possible future revisions of this instrument. We view scores on the Padua inventory personality traits in that they are measurable in the general population along a continuum. In fact the instrument was originally developed for community use (Sanavio, 1988); this is in contrast to clinical measures of OCD, such as the Yale-Brown Obsessive Compulsive Scale, which are unsuitable for phenotyping research due to a high likelihood of zero score in those without formal OCD.

## References

- Abdi H and Williams LJ. (2013) Partial least squares methods: partial least squares correlation and partial least square regression. *Methods Mol Biol* 930: 549-579.
- American Psychiatric Association. (2013) *Diagnostic and statistical manual of mental disorders (5th ed.) (DSM-5)*, Arlington, VA: American Psychiatric Publishing.
- Bagozzi RP and Yi Y. (2012) Specification, evaluation, and interpretation of structural equation models. *Journal of the academy of marketing science* 40: 8 - 34.
- Benjamini Y and Hochberg Y. (1995) Controlling the False Discovery Rate: A Practical and Powerful Approach to Multiple Testing. *Journal of the Royal Statistical Society. Series B (Methodological)* 57: 289-300.
- Bentler PM and Bonett DG. (1980) Significance tests and goodness of fit in the analysis of covariance structures. *Psychological Bulletin* 88: 588 - 606.
- Bonifay W, Lane SP and Reise SP. (2017) Three concerns with applying a bifactor model as a structure of psychopathology. *Clinical Psychological Science* 5: 184-186.
- Browne MW and Cudeck R. (1993) Alternative ways of assessing model fit. In: Bollen KA and Long JS (eds) *Testing Structural Equation Models*. Newbury Park, CA: Sage, 136 -162
- Burns GL. (1995) *Padua Inventory-Washington State University Revision*. : Pullman, WA. (Available from G. Leonard Burns, Department of Psychology, Washington State University, Pullman, WA 99164-4820).
- Burns GL, Keortge SG, Formea GM, et al. (1996) Revision of the Padua Inventory of obsessive compulsive disorder symptoms: distinctions between worry, obsessions, and compulsions. *Behav Res Ther* 34: 163-173.
- Chamberlain SR and Grant JE. (2018) Initial Validation of a Trans-diagnostic Compulsivity Questionnaire: The Cambridge-Chicago Compulsivity Trait Scale. *CNS Spectrums* In press.
- Chamberlain SR, Stochl J, Redden SA, et al. (2017) Latent traits of impulsivity and compulsivity: toward dimensional psychiatry. *Psychol Med* 48: 810-821.
- Cox I and Gaudard M. (2013) *Discovering Partial Least Squares with JMP*, Cary, North Carolina, USA: SAS Institute Inc.
- Cramer RD. (1993) Partial Least Squares (PLS): Its strengths and limitations. *Perspectives in Drug Discovery and Design* 1: 269-278.
- Cribbie RA. (2007) Multiplicity control in structural equation modeling. *Structural equation modeling* 14: 98-112.
- Elgar FJ, Waschbusch DA, Dadds MR, et al. (2007) Development and Validation of a Short Form of the Alabama Parenting Questionnaire. *Journal of Child and Family Studies* 16: 243-259.
- Frick PJ, O'Brien BS, Wootton JM, et al. (1994) Psychopathy and conduct problems in children. *J Abnorm Psychol* 103: 700-707.
- Garthwaite PH. (1994) An Interpretation of Partial Least Squares. *Journal of the American Statistical Association* 89: 122-127.
- Goodyer IM, Herbert J, Tamplin A, et al. (1997) Short-term outcome of major depression: II. Life events, family dysfunction, and friendship difficulties as predictors of persistent disorder. *J Am Acad Child Adolesc Psychiatry* 36: 474-480.
- Grice JW. (2001) Computing and evaluating factor scores. *Psychological methods* 6: 430-450.
- Guo K, Youssef GJ, Dawson A, et al. (2017) A psychometric validation study of the Impulsive-Compulsive Behaviours Checklist: A transdiagnostic tool for addictive and compulsive behaviours. *Addict Behav* 67: 26-33.
- Hancock GR and Mueller RO. (2001) Rethinking construct reliability within latent variable systems. In: Cudeck R, du Toit S and Sorbom D (eds) *Structural equation modeling: Present and future - A festschrift in honor of Karl Joreskog*. Lincolnwood, IL: Scientific Software International, 195-216.
- Höskuldsson A. (1988) PLS regression methods. *Journal of Chemometrics* 2: 211-228.
- Kessler RC, Andrews G, Colpe LJ, et al. (2002) Short screening scales to monitor population prevalences and trends in non-specific psychological distress. *Psychol Med* 32: 959-976.



- Kline RB. (2016) *Principles and practice of structural equation modeling*, New York: The Guilford Press.
- Lindner P, Frykheden O, Forsstrom D, et al. (2016) The Brunnsvikén Brief Quality of Life Scale (BBQ): Development and Psychometric Evaluation. *Cogn Behav Ther* 45: 182-195.
- Marsh HW, Hau KT and Wen Z. (2004) In search of golden rules: Comment on hypothesis-testing approaches to setting cutoff values for fit indexes and dangers in overgeneralizing Hu and Bentler's (1999) findings. *Structural equation modeling* 11: 320-341.
- Menzies L, Achard S, Chamberlain SR, et al. (2007) Neurocognitive endophenotypes of obsessive-compulsive disorder. *Brain* 130: 3223-3236.
- Moulding R, Anglim J, Nedeljkovic M, et al. (2011) The Obsessive Beliefs Questionnaire (OBQ): examination in nonclinical samples and development of a short version. *Assessment* 18: 357-374.
- Munoz LC and Frick PJ. (2007) The reliability, stability, and predictive utility of the self-report version of the Antisocial Process Screening Device. *Scand J Psychol* 48: 299-312.
- Muthén B, du Toit SHC and Spisic D. (1997) Robust inference using weighted least squares and quadratic estimating equations in latent variable modeling with categorical and continuous outcomes. *Conditionally accepted for publication in Psychometrika*.
- Muthén LK and Muthén BO. (1998 - 2012) *Mplus user's guide.*, Los Angeles, CA: Muthén & Muthén.
- Parker G, Roussos J, Hadzi-Pavlovic D, et al. (1997) The development of a refined measure of dysfunctional parenting and assessment of its relevance in patients with affective disorders. *Psychol Med* 27: 1193-1203.
- Patton JH, Stanford MS and Barratt ES. (1995) Factor structure of the Barratt impulsiveness scale. *J. Clin. Psychol.* 51: 768-774.
- Reise SP. (2012a) Invited Paper: The Rediscovery of Bifactor Measurement Models. *Multivariate Behav Res* 47: 667-696.
- Reise SP. (2012b) The rediscovery of bifactor measurement models. *Multivariate Behavioral Research* 47: 667 - 696.
- Ridenour TA, Daley JG and Reich W. (1999) Factor analyses of the family assessment device. *Fam Process* 38: 497-510.
- Robbins TW, Gillan CM, Smith DG, et al. (2012) Neurocognitive endophenotypes of impulsivity and compulsivity: Towards dimensional psychiatry. *Trends in Cognitive Sciences* 16: 81 - 91.
- Rodriguez A, Reise SP and Haviland MG. (2016a) Applying bifactor statistical indices in the evaluation of psychological measures. *J Pers Assess* 98: 223-237.
- Rodriguez A, Reise SP and Haviland MG. (2016b) Evaluating bifactor models: Calculating and interpreting statistical indices. *Psychol Methods* 21: 137-150.
- Sanavio E. (1988) Obsessions and compulsions: the Padua Inventory. *Behav Res Ther* 26: 169-177.
- Sheehan DV, Lecrubier Y, Sheehan KH, et al. (1998) The Mini-International Neuropsychiatric Interview (M.I.N.I.): the development and validation of a structured diagnostic psychiatric interview for DSM-IV and ICD-10. *J Clin Psychiatry* 59 Suppl 20: 22-33;quiz 34-57.
- Silvia ESM and MacCallum RC. (1988) Some factors affecting the success of specification searches in covariance structure modeling. *Multivariate Behavioral Research* 23: 297 - 326.
- Stanford MS, Mathias CW, Dougherty DM, et al. (2016) Fifty years of the Barratt Impulsiveness Scale: An update and review. *Personality and Individual Differences* 47: 385-395.
- Steinberg L, Sharp C, Stanford MS, et al. (2013) New tricks for an old measure: the development of the Barratt Impulsiveness Scale-Brief (BIS-Brief). *Psychol Assess* 25: 216-226.
- Yu C-Y. (2002) Evaluating cutoff criteria of model fit indices for latent variable models with binary and continuous outcomes. University of California Los Angeles.

## **Additional References for Study Instruments in Main Manuscript**

- American Psychiatric Association (2013). *Diagnostic and statistical manual of mental disorders (5th ed.) (DSM-5)*. Arlington, VA, American Psychiatric Publishing.
- Burns, G. L. (1995). *Padua Inventory-Washington State University Revision*. , Pullman, WA. (Available from G. Leonard Burns, Department of Psychology, Washington State University, Pullman, WA 99164-4820).
- Chamberlain, S. R. and J. E. Grant (2018). "Initial Validation of a Trans-diagnostic Compulsivity Questionnaire: The Cambridge-Chicago Compulsivity Trait Scale." *CNS Spectrums* In press.
- Elgar, F. J., D. A. Waschbusch, M. R. Dadds and N. Sigvaldason (2007). "Development and Validation of a Short Form of the Alabama Parenting Questionnaire." *Journal of Child and Family Studies* 16(2): 243-259.
- Goodyer, I. M., J. Herbert, A. Tamplin, S. M. Secher and J. Pearson (1997). "Short-term outcome of major depression: II. Life events, family dysfunction, and friendship difficulties as predictors of persistent disorder." *J Am Acad Child Adolesc Psychiatry* 36(4): 474-480.
- Kessler, R. C., G. Andrews, L. J. Colpe, E. Hiripi, D. K. Mroczek, S. L. Normand, E. E. Walters and A. M. Zaslavsky (2002). "Short screening scales to monitor population prevalences and trends in non-specific psychological distress." *Psychol Med* 32(6): 959-976.
- Lindner, P., O. Frykheden, D. Forsstrom, E. Andersson, B. Ljotsson, E. Hedman, G. Andersson and P. Carlbring (2016). "The Brunnsvikien Brief Quality of Life Scale (BBQ): Development and Psychometric Evaluation." *Cogn Behav Ther* 45(3): 182-195.
- Moulding, R., J. Anglim, M. Nedeljkovic, G. Doron, M. Kyrios and A. Ayalon (2011). "The Obsessive Beliefs Questionnaire (OBQ): examination in nonclinical samples and development of a short version." *Assessment* 18(3): 357-374.
- Munoz, L. C. and P. J. Frick (2007). "The reliability, stability, and predictive utility of the self-report version of the Antisocial Process Screening Device." *Scand J Psychol* 48(4): 299-312.

Parker, G., J. Roussos, D. Hadzi-Pavlovic, P. Mitchell, K. Wilhelm and M. P. Austin (1997). "The development of a refined measure of dysfunctional parenting and assessment of its relevance in patients with affective disorders." *Psychol Med* 27(5): 1193-1203.

Patton, J. H., M. S. Stanford and E. S. Barratt (1995). "Factor structure of the Barratt impulsiveness scale." *J. Clin. Psychol.* 51(6): 768-774.

Ridenour, T. A., J. G. Daley and W. Reich (1999). "Factor analyses of the family assessment device." *Fam Process* 38(4): 497-510.

Sanavio, E. (1988). "Obsessions and compulsions: the Padua Inventory." *Behav Res Ther* 26(2): 169-177.

Sheehan, D. V., Y. Lecrubier, K. H. Sheehan, P. Amorim, J. Janavs, E. Weiller, T. Hergueta, R. Baker and G. C. Dunbar (1998). "The Mini-International Neuropsychiatric Interview (M.I.N.I.): the development and validation of a structured diagnostic psychiatric interview for DSM-IV and ICD-10." *J Clin Psychiatry* 59 Suppl 20: 22-33;quiz 34-57.

Stanford, M. S., C. W. Mathias, D. M. Dougherty, S. L. Lake, N. E. Anderson and J. H. Patton (2016). "Fifty years of the Barratt Impulsiveness Scale: An update and review." *Personality and Individual Differences* 47(5): 385-395.

Steinberg, L., C. Sharp, M. S. Stanford and A. T. Tharp (2013). "New tricks for an old measure: the development of the Barratt Impulsiveness Scale-Brief (BIS-Brief)." *Psychol Assess* 25(1): 216-226.

van Harmelen, A. L., R. A. Kievit, K. Ioannidis, S. Neufeld, P. B. Jones, E. Bullmore, R. Dolan, N. Consortium, P. Fonagy and I. Goodyer (2017). "Adolescent friendships predict later resilient functioning across psychosocial domains in a healthy community cohort." *Psychol Med* 47(13): 2312-2322.
